# Supplementary material for: Efficiency analysis of color image filtering
Source: Springer Nature journal article supplement (doi:10.1186/1687-6180-2011-41), 2011-08-15
Supplement: 13634_2011_37_MOESM1_ESM.pdf [file 13634_2011_37_MOESM1_ESM.pdf]

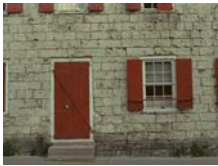

1

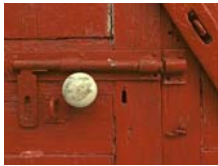

2

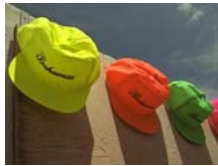

3

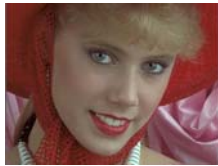

4

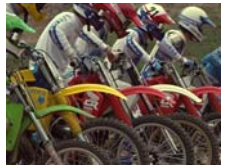

5

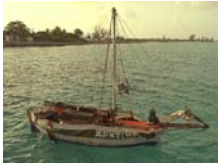

6

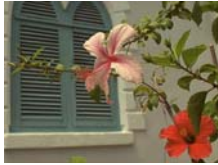

7

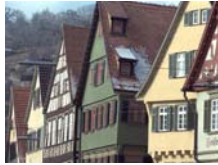

8

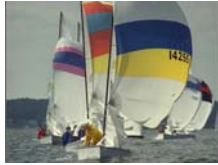

9

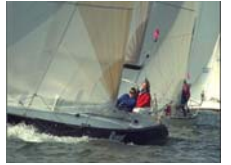

10

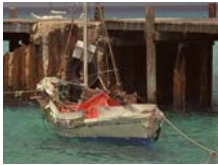

11

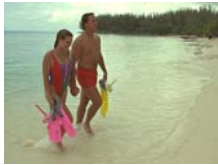

12

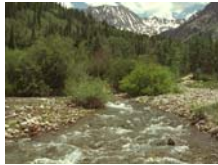

13

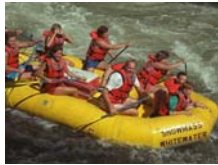

14

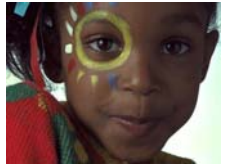

15

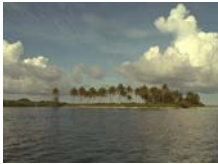

16

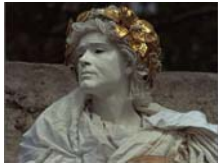

17

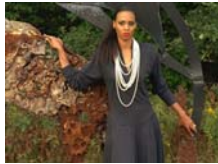

18

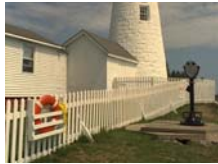

19

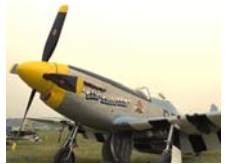

20

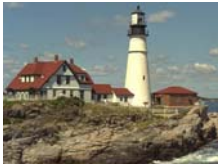

21

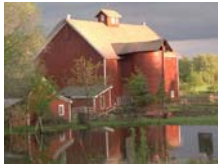

22

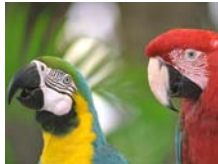

23

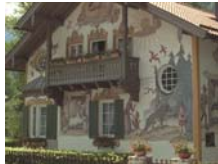

24

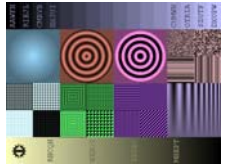

25
