# Supplementary material for: Efficiency analysis of color image filtering
Source: Springer Nature journal article supplement (doi:10.1186/1687-6180-2011-41), 2011-08-15

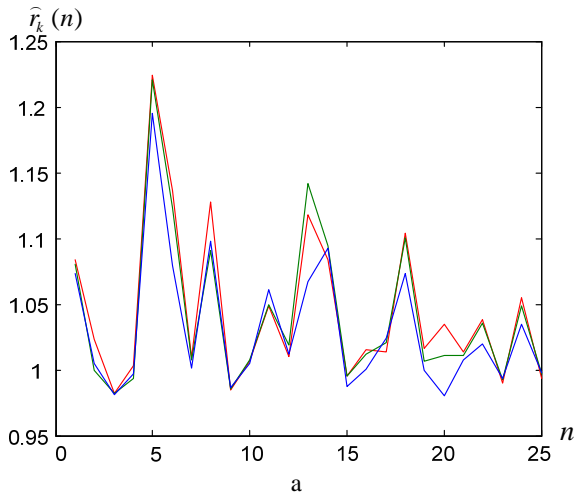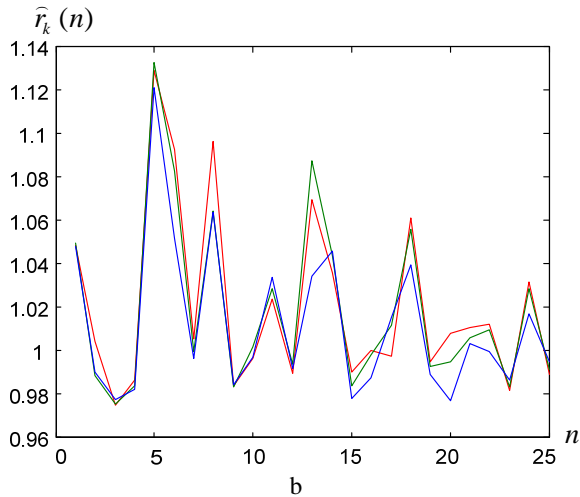

Supplement: 13634_2011_37_MOESM4_ESM.pdf [file 13634_2011_37_MOESM4_ESM.pdf]
