# Supplementary material for: Efficiency analysis of color image filtering
Source: Springer Nature journal article supplement (doi:10.1186/1687-6180-2011-41), 2011-08-15

*PSNR – HVS –  $M_k(n)$ , dB*

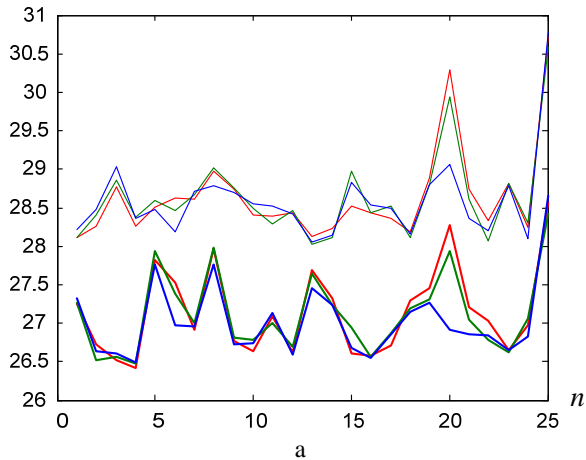

*PSNR – HVS –  $M_k(n)$ , dB*

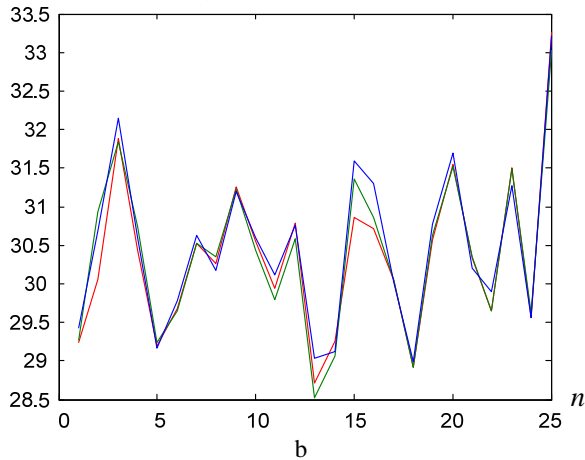

Supplement: 13634_2011_37_MOESM10_ESM.pdf [file 13634_2011_37_MOESM10_ESM.pdf]
