# Supplementary material for: Efficiency analysis of color image filtering
Source: Springer Nature journal article supplement (doi:10.1186/1687-6180-2011-41), 2011-08-15
Supplement: 13634_2011_37_MOESM15_ESM.pdf [file 13634_2011_37_MOESM15_ESM.pdf]

|      |      |      |      |      |      |      |      |
|------|------|------|------|------|------|------|------|
| 2.69 | 2.37 | 2.04 | 1.51 | 0.93 | 0.51 | 0.59 | 0.81 |
| 2.39 | 2.09 | 1.80 | 1.35 | 0.85 | 0.45 | 0.52 | 0.75 |
| 2.04 | 1.80 | 1.53 | 1.14 | 0.72 | 0.38 | 0.43 | 0.62 |
| 1.52 | 1.35 | 1.15 | 0.85 | 0.53 | 0.29 | 0.33 | 0.48 |
| 0.93 | 0.85 | 0.70 | 0.53 | 0.33 | 0.18 | 0.20 | 0.29 |
| 0.51 | 0.45 | 0.38 | 0.29 | 0.18 | 0.10 | 0.11 | 0.16 |
| 0.58 | 0.52 | 0.44 | 0.33 | 0.21 | 0.11 | 0.12 | 0.18 |
| 0.84 | 0.75 | 0.63 | 0.48 | 0.29 | 0.16 | 0.18 | 0.26 |

a

|      |      |      |      |      |      |      |      |
|------|------|------|------|------|------|------|------|
| 2.40 | 2.25 | 1.95 | 1.61 | 1.18 | 0.76 | 0.40 | 0.16 |
| 2.19 | 1.99 | 1.80 | 1.47 | 1.06 | 0.70 | 0.37 | 0.15 |
| 1.99 | 1.80 | 1.60 | 1.31 | 0.96 | 0.63 | 0.32 | 0.13 |
| 1.60 | 1.46 | 1.31 | 1.06 | 0.79 | 0.51 | 0.27 | 0.11 |
| 1.17 | 1.09 | 0.98 | 0.78 | 0.58 | 0.38 | 0.19 | 0.08 |
| 0.77 | 0.70 | 0.61 | 0.51 | 0.38 | 0.25 | 0.13 | 0.05 |
| 0.41 | 0.37 | 0.33 | 0.27 | 0.20 | 0.13 | 0.07 | 0.03 |
| 0.16 | 0.15 | 0.13 | 0.10 | 0.08 | 0.05 | 0.03 | 0.01 |

b
